# Supplementary material for: Gene Circuit Analysis of the Terminal Gap Gene huckebein
Source: PubMed Central journal article supplement (PMC2760955; doi:10.1371/journal.pcbi.1000548), 2009-10-30
Supplement: pcbi.1000548.s001.pdf [file pcbi.1000548.s001.pdf]

Expression Data (with Standard Deviations) used for Model Fitting

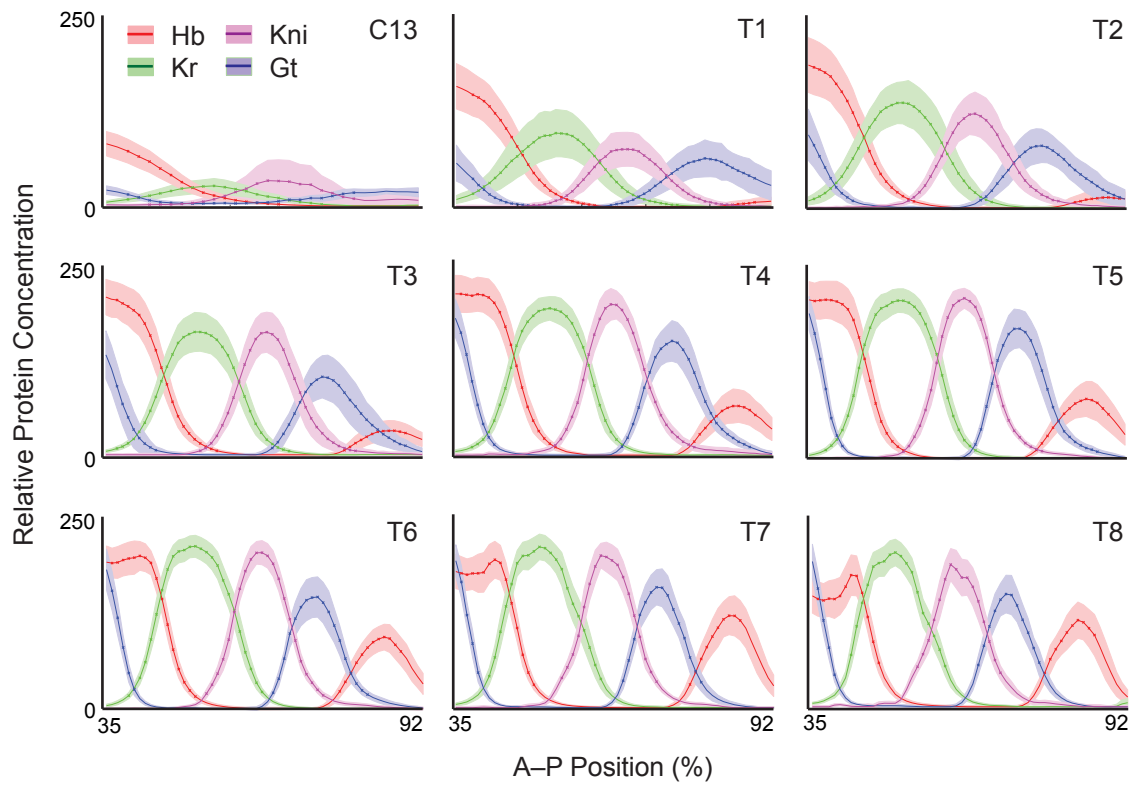

**Figure S1**
