# Supplementary material for: Gene Circuit Analysis of the Terminal Gap Gene huckebein
Source: PubMed Central journal article supplement (PMC2760955; doi:10.1371/journal.pcbi.1000548), 2009-10-30
Supplement: pcbi.1000548.s002.pdf [file pcbi.1000548.s002.pdf]

Ordinary Least Squares (OLS) Solutions (N=39)

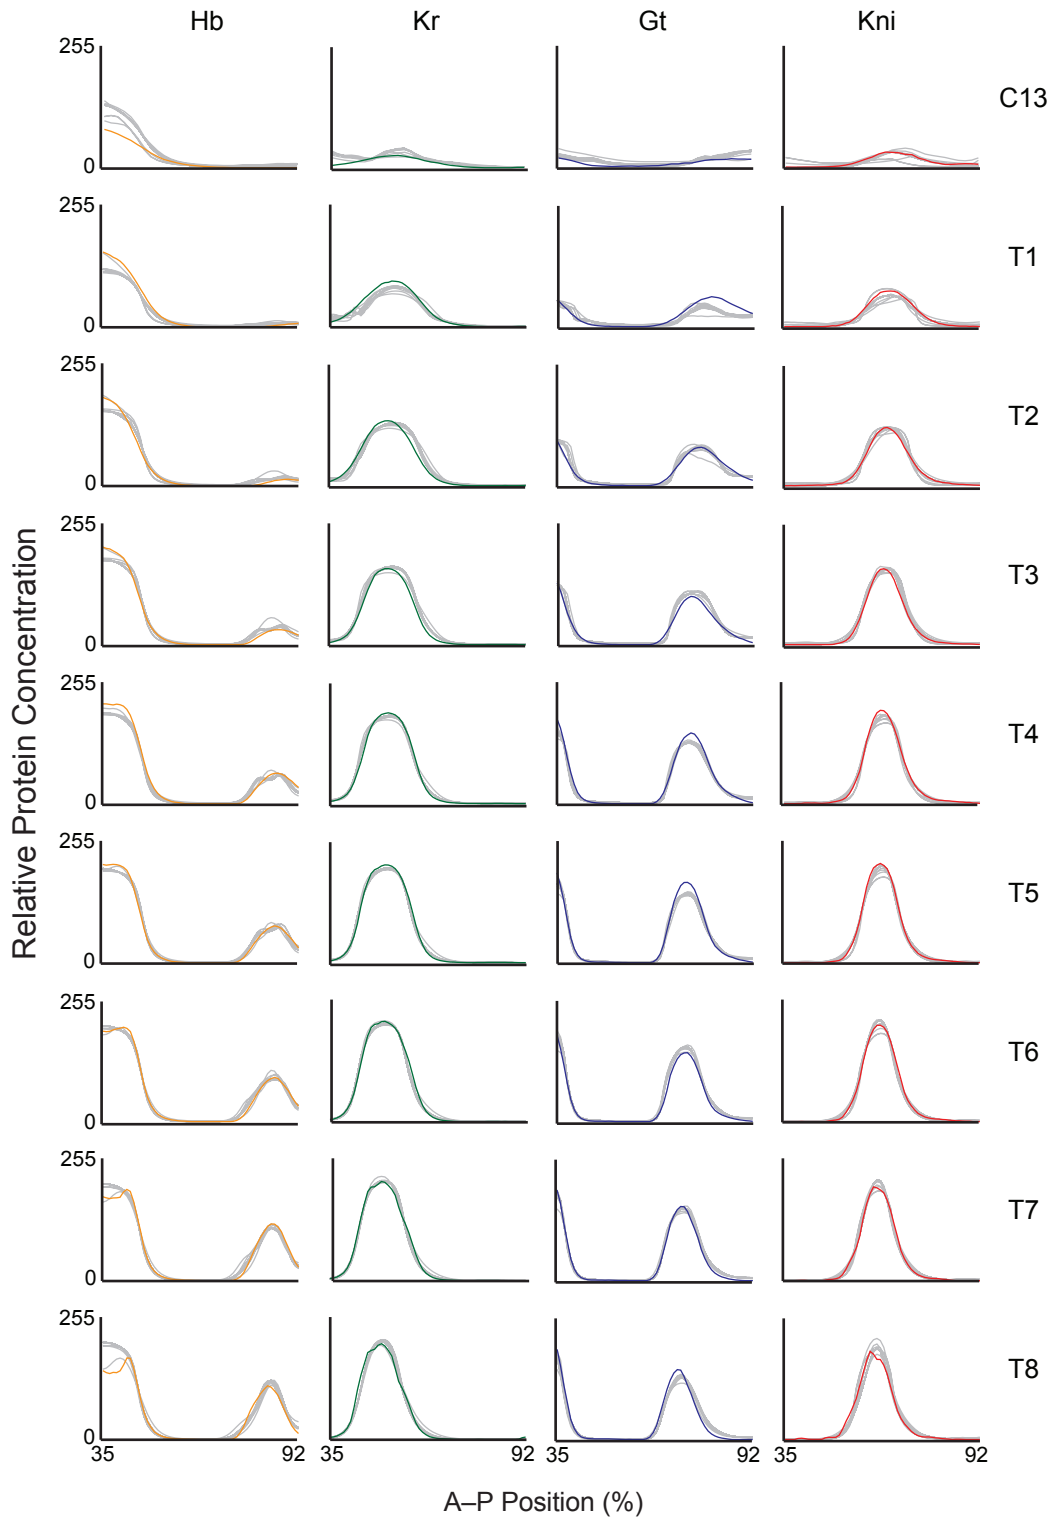

Figure S2
