# Supplementary material for: Gene Circuit Analysis of the Terminal Gap Gene huckebein
Source: PubMed Central journal article supplement (PMC2760955; doi:10.1371/journal.pcbi.1000548), 2009-10-30
Supplement: pcbi.1000548.s003.pdf [file pcbi.1000548.s003.pdf]

Weighted Least Squares (WLS) Solutions (N=117)

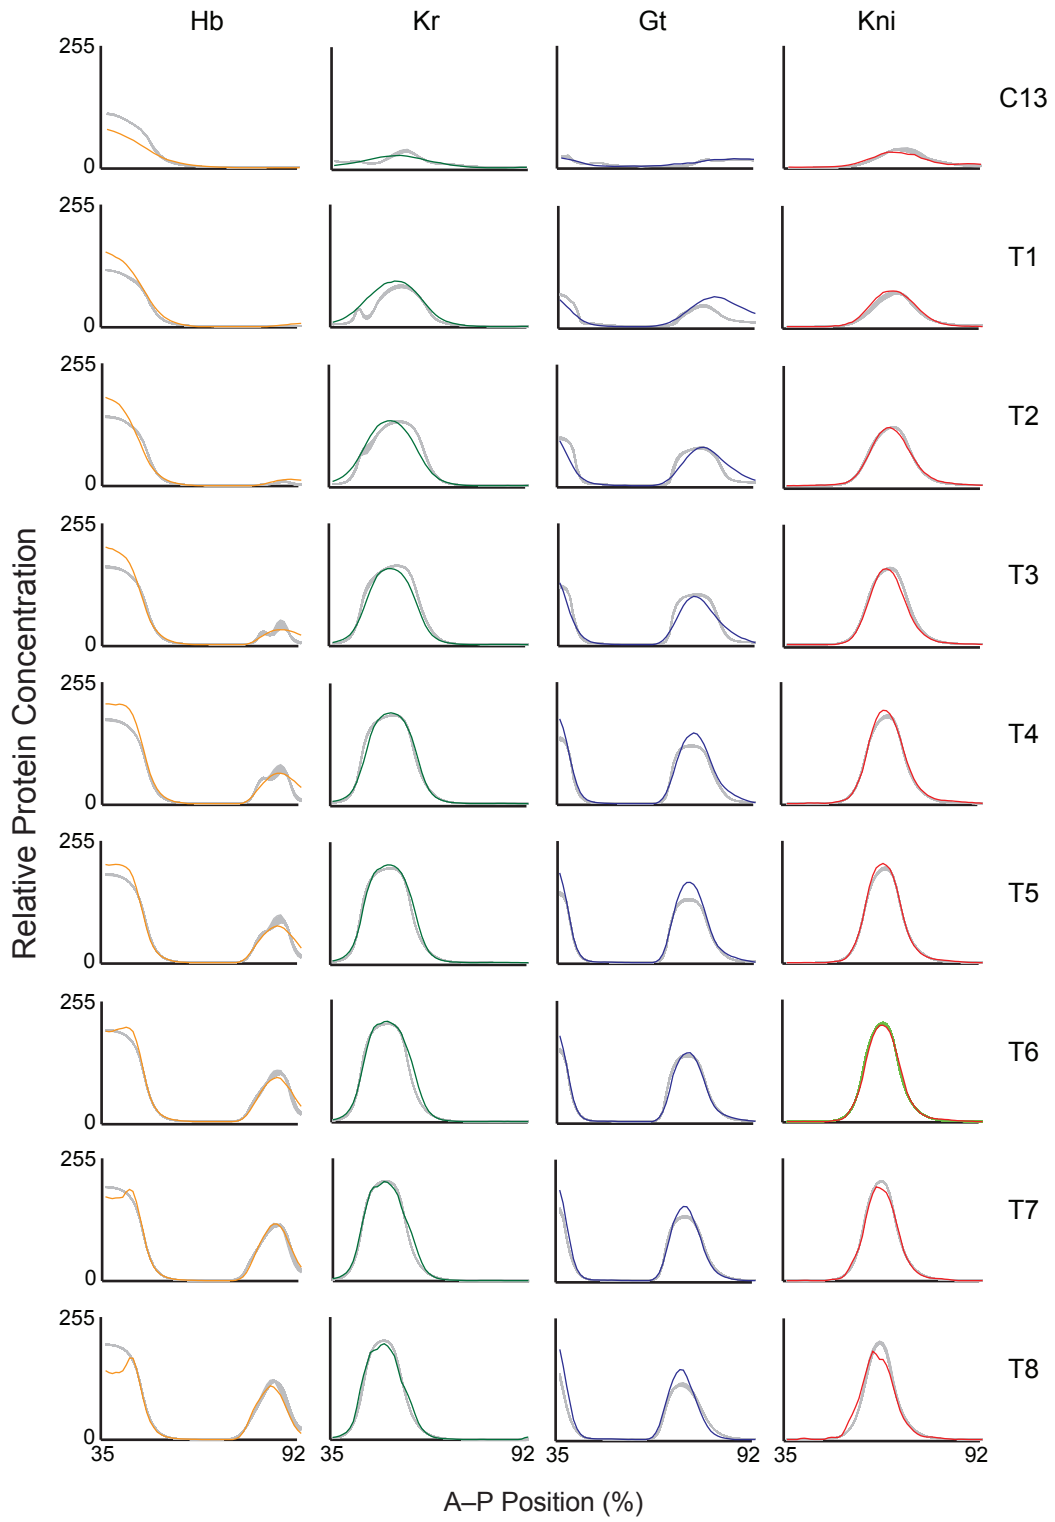

Figure S3
