# Supplementary material for: Gene Circuit Analysis of the Terminal Gap Gene huckebein
Source: PubMed Central journal article supplement (PMC2760955; doi:10.1371/journal.pcbi.1000548), 2009-10-30
Supplement: pcbi.1000548.s005.pdf [file pcbi.1000548.s005.pdf]

Confidence Intervals (WLS)

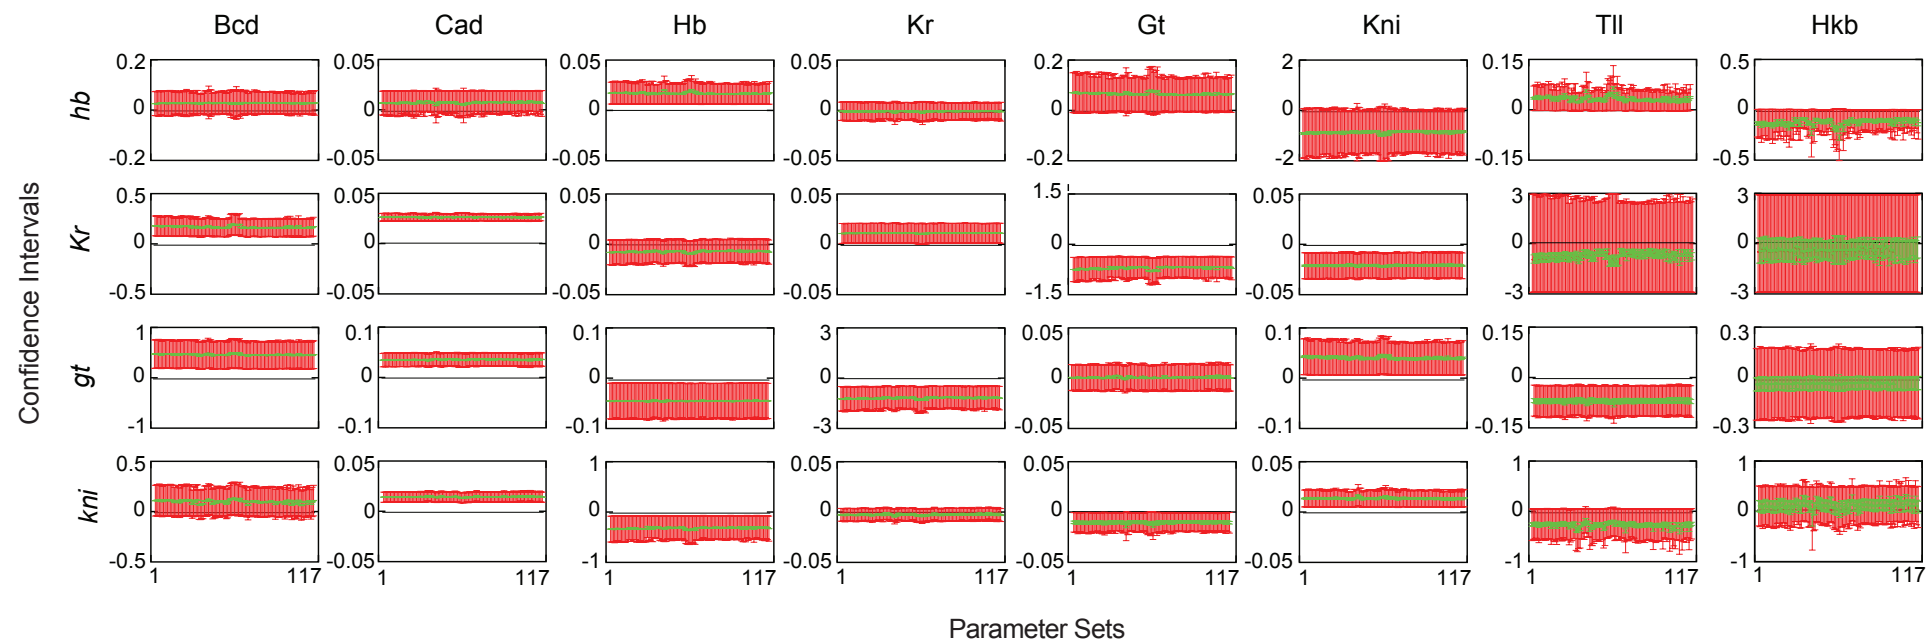

Figure S5
